# Supplementary material for: Assessment of Seasonality and Extremely Preterm Birth in Denmark
Source: PubMed Central journal article supplement (PMC8814911; doi:10.1001/jamanetworkopen.2021.45800), 2022-02-03
Supplement: jamanetwopen-e2145800-s001.pdf [file jamanetwopen-e2145800-s001.pdf]

## Supplementary Online Content

Hviid A, Laksafoss A, Hedley P, et al. Assessment of seasonality and extremely preterm birth in Denmark. *JAMA Netw Open*. 2022;5(2):e2145800. doi:10.1001/jamanetworkopen.2021.45800

**eTable 1.** *ICD-10* Codes Used From the National Hospital Register

**eTable 2.** Sensitivity Analyses of the Association Between Season During Gestation and Extremely Preterm Birth

This supplementary material has been provided by the authors to give readers additional information about their work.

**eTable 1.** ICD-10 Codes Used From the National Hospital Register

| Variables                        | ICD-10 Codes            |
|----------------------------------|-------------------------|
|                                  |                         |
| <b>Abortive Outcomes</b>         |                         |
| Other Abortive Outcomes          | O01, O02                |
| Spontaneous Abortions            | O03                     |
| Induced Abortions                | O04, O05, O06, O07, O08 |
|                                  |                         |
| <b>Pre-eclampsia<sup>1</sup></b> | O14, O15.0              |
|                                  |                         |

(1) Klemmensen AK, Olsen SF, Osterdal ML, Tabor A. Validity of preeclampsia-related diagnoses recorded in a national hospital registry and in a postpartum interview of the women. *Am J Epidemiol.* 2007 Jul 15;166(2):117-24. doi: 10.1093/aje/kwm139. Epub 2007 Jun 7.

**eTable 2.** Sensitivity Analyses of the Association Between Season During Gestation and Extremely Preterm Birth

|                                                                                                                                                    | Extremely Preterm Births | Pregnancies under study | 1,000,000 Fetal Weeks | Spring v Winter  | Summer v Winter  | Autumn v Winter  |
|----------------------------------------------------------------------------------------------------------------------------------------------------|--------------------------|-------------------------|-----------------------|------------------|------------------|------------------|
| Complete case analysis with adjustment for BMI and smoking status*                                                                                 | 1140                     | 689,680                 | 4.12                  | 1.03 (0.87-1.22) | 1.09 (0.92-1.29) | 1.22 (1.03-1.44) |
| Considering only spontaneous live births                                                                                                           | 811                      | 1,136,143               | 6.78                  | 1.20 (0.98-1.47) | 1.30 (1.06-1.59) | 1.35 (1.11-1.66) |
| Adjusting for interpartum length**                                                                                                                 | 1985                     | 1,123,956               | 6.71                  | 1.09 (0.96-1.24) | 1.14 (1.00-1.29) | 1.24 (1.09-1.41) |
| Excluding pregnancies with interpartum length <18 months                                                                                           | 1812                     | 1,083,878               | 6.47                  | 1.08 (0.99-1.17) | 1.05 (0.96-1.14) | 1.12 (1.03-1.22) |
| Excluding pregnancies with pre-eclampsia                                                                                                           | 1764                     | 1,103,600               | 6.58                  | 1.05 (0.96-1.15) | 1.07 (0.98-1.17) | 1.14 (1.04-1.25) |
| Adjusting for pre-eclampsia status as a time varying variable                                                                                      | 2009                     | 1,136,143               | 6.78                  | 1.12 (0.99-1.27) | 1.15 (1.01-1.31) | 1.24 (1.09-1.41) |
| * BMI in 6 groups (<18.5, 18.5-25, 25-30, 30-35, 35-40, 40-45, >45) and smoking in 3 groups (non-smoker, stopped smoking during pregnancy, smoker) |                          |                         |                       |                  |                  |                  |
| ** Interpartum length in 4 groups (First pregnancy, <18mo, 18mo-4yrs, >4yrs)                                                                       |                          |                         |                       |                  |                  |                  |
